# Supplementary material for: Radiotherapy for glioblastoma patients with poor performance status
Source: Springer Nature journal article supplement (doi:10.1007/s00432-021-03770-9), 2021-08-26

# Supplementary File

Radiotherapy group

Control group

A

N=25

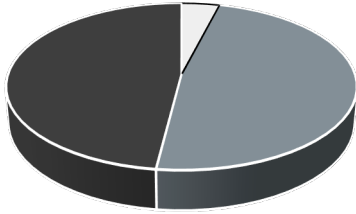

Biopsy  
P=0.037

N=26

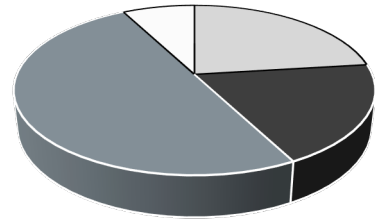

B

N=18

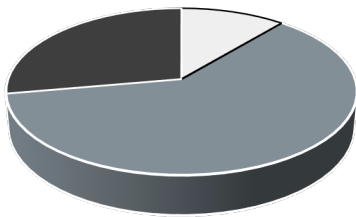

Resection  
P=0.757

N=24

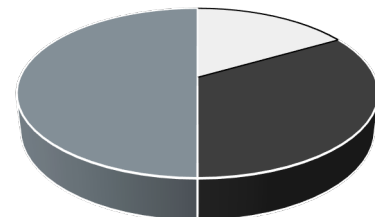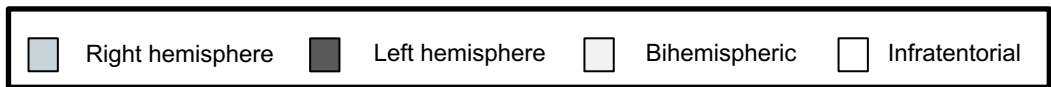

C

N=25

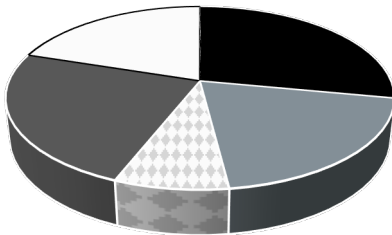

Biopsy  
P=0.613

N=26

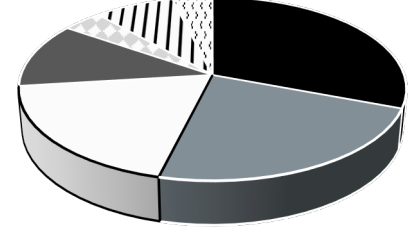

D

N=18

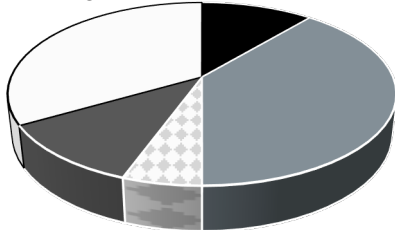

Resection  
P=0.059

N=24

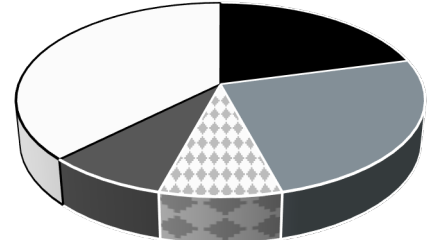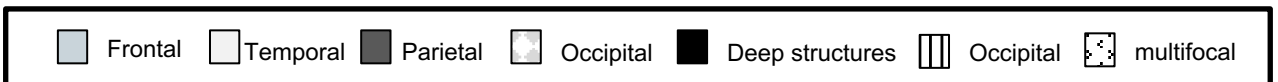

Supplement: MOESM1 [file 19601792]
